# Supplementary material
Source: MDPI journal article supplement (https://www.mdpi.com/search?q=cells-10-00291)
Supplement: s001 [file cells-10-00291-s001.pdf]

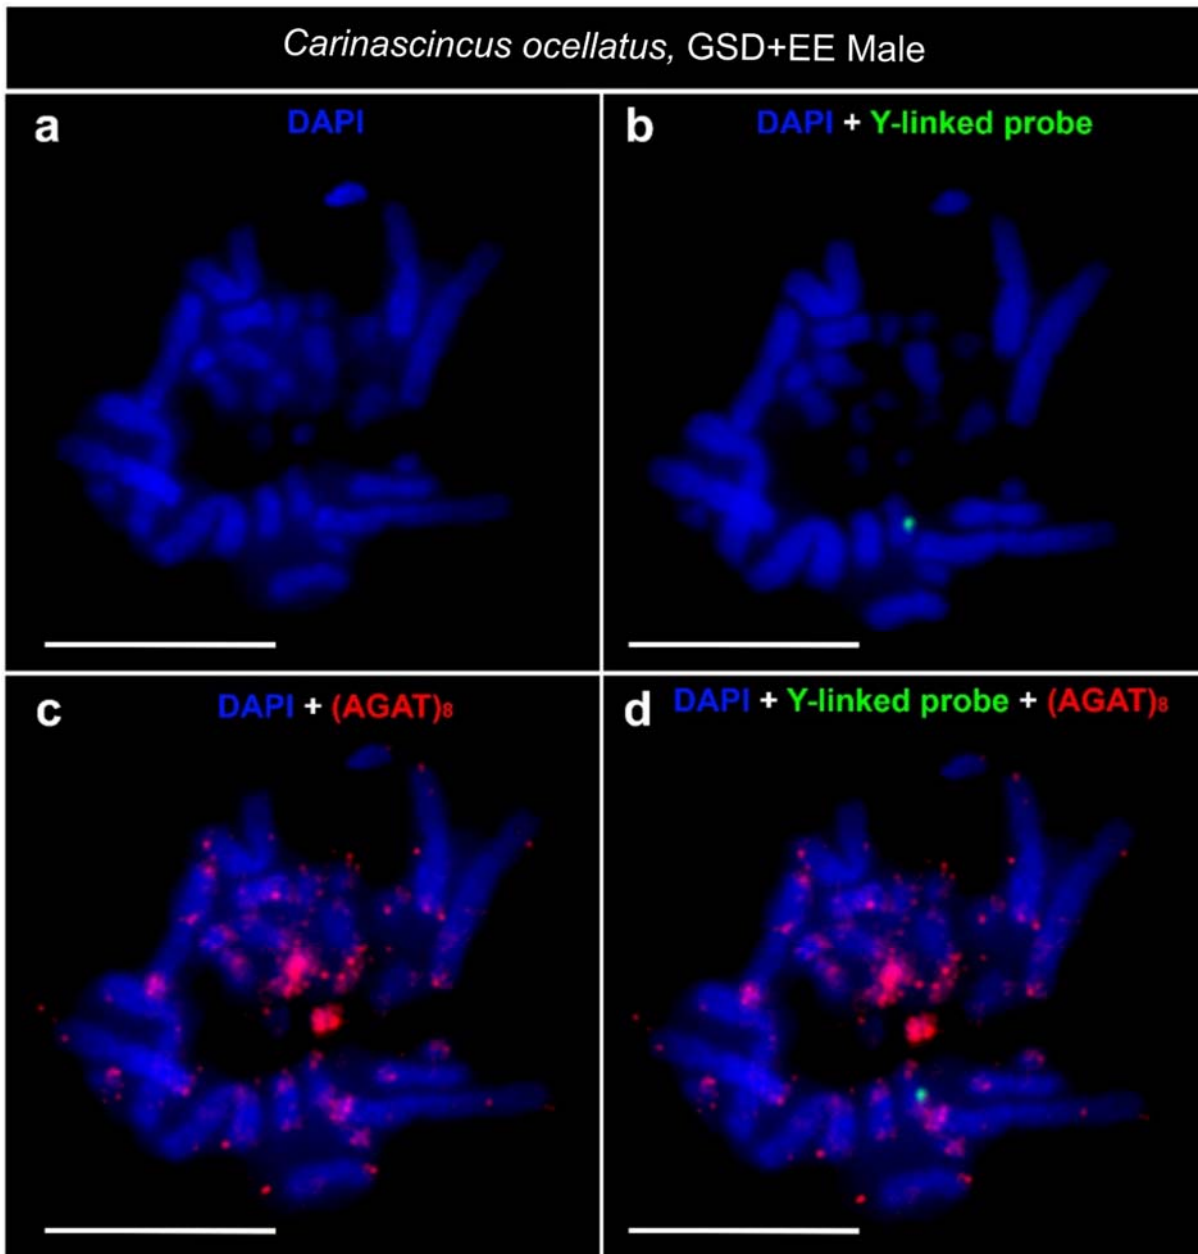

**Figure S1:** Sequential FISH with Y-linked probe set and (AGAT)<sub>8</sub> probe in low elevation (GSD+EE) population of *C. ocellatus*. (a) DAPI stained metaphase spread of male *C. ocellatus*; (b) FISH with Y-linked probe set (Pseudocoloured image) on same metaphase; (c) FISH with (AGAT)<sub>8</sub> microsatellite probe on same metaphase; (d) superimposed image of all layers (DAPI, signals from Y-linked probe set and signals from (AGAT)<sub>8</sub>).

**Table 1.** Custom Y-linked probe set sequences for *Carinascincus ocellatus* GSD and GSD+EE populations and homologs of our markers with publicly available sequences from vertebrates from NCBI BLAST [66].

| Locus ID | Sequence                                                                   | homology                                                     | E value                 |
|----------|----------------------------------------------------------------------------|--------------------------------------------------------------|-------------------------|
| 15694756 | TGCAGTCATGTGGCCGGTATGCCACATATATGCCAAGGTGAACAAAACGCTG<br>TTGCCTTCCAACCAAAG  | <i>Elaphe dione</i> clone ela2 Squam-1 SINE repeat sequence. | 2.34 × 10 <sup>-4</sup> |
| 15694756 | TGCAGTCATGTGGCCGGTATGCCACATATATGCCAAGGTGAACAAAACGCTG<br>TTGCCTTCCAACCAAAG  | <i>Azemiops feae</i> clone AFE-4 SINE, complete sequence     | 8.17 × 10 <sup>-4</sup> |
| 15705269 | TGCAGGACACTGGCAGGGCCAGAGGGTGCCCCAGCATCCCTCACCTGGG                          | NA                                                           | NA                      |
| 15698539 | TGCAGAAAAAGGGTTGTGGCTATCAATTAATTTTTACCTATATAAATTGCT<br>TACCCACTTTG         | NA                                                           | NA                      |
| 15701508 | TGCAGGTAAGTCTCACAGTGGGTGGCAGAGCTAGAGGGGGACACAGTAGAG<br>AACGTTGGAGAGGGG     | NA                                                           | NA                      |
| 15727479 | TGCAGCCGCTACAGGGAGACTGAGGGGGGATCATTTCAGCCAGG                               | NA                                                           | NA                      |
| 15704137 | TGCAGGAACTTATGTCAACTCTACAGGAAATGGAAGGCGAGACCACAGTT<br>GATTGG               | NA                                                           | NA                      |
| 15694656 | TGCAGCTGTTACTGTTGTGCAGGGACTCCAGGCACCTCAGCTGTTTAGTGTGA<br>TCTGAGGCAGGTCTC   | NA                                                           | NA                      |
| 15698519 | TGCAGTTATGCAGGAAGCAGCCATTCTGTGTCTGGCTCTGGTTCACCAGGC<br>CCACTTTGTCTGCACT    | NA                                                           | NA                      |
| 15704111 | TGCAGCATTTCTGAGCCCAGCTCTGGGCGTGCGCACTGGGGACAATGAACGC<br>GCCAGTGCTGAGTGCA   | NA                                                           | NA                      |
| 15712147 | TGCAGCAAAGCCTCAAACCTGTGCTGGATATAGCGCAAGCGG                                 | NA                                                           | NA                      |
| 15694951 | TGCAGGCTGCTCTGGAAATGGCTCTTCTCGGTGTGCAGAGCTCCTGTG                           | NA                                                           | NA                      |
| 15706148 | TGCAGAAAGGGTGAACAGTTCCTTTATCCATTGAGT                                       | NA                                                           | NA                      |
| 15694660 | TGCAGTTCCTTCTCCCCATTGCTGAAGATCAAGGGATGCTCTGTAGCATCAT<br>CCCATGCAGCACAGAG   | NA                                                           | NA                      |
| 15694518 | TGCAGCTTCAAATCTCCAGGCCACTTGGCCTAGTTTTTTTAAACAGCTTCCAGC<br>TGCATCTAAAAGGGGA | NA                                                           | NA                      |
| 15694646 | TGCAGCTCAAGAACTCTGCCAGTTTTCCCCCTTAAACAGTGCGGTCTGAGC<br>ATAGTTTCCCCTTTAG    | NA                                                           | NA                      |
| 15694818 | TGCAGTTTTGGACTGTTGCGAGGAGGGGTTTACAATAGTGAAGAACTTCT<br>GCTATTGTAAATTGGCT    | NA                                                           | NA                      |
| 15700798 | TGCAGGACTTAAAAGCTGCATATGAAGTGTGCATCTTAGGAAGTAAATTTG<br>CTGAACCTCAGCAGGG    | NA                                                           | NA                      |
| 15704112 | TGCAGCCAAGGCTGTAGCCATGAGGTGGGGGAGGGACTTCGTCCTAGTCCCC<br>CCTCCATGTAGATTCC   | NA                                                           | NA                      |
| 15725981 | TGCAGGGAGGGAACAGGGATTGGGCTGCAATCCTGTTGTAAGAGAGCACTA<br>TGAACACAATCCTAAG    | NA                                                           | NA                      |
| 15694991 | TGCAGTACTTTCCTGGAAGAAGCCCTATGTCTAAGTGCATAGT                                | NA                                                           | NA                      |

|          |                                                                           |    |    |
|----------|---------------------------------------------------------------------------|----|----|
| 15694717 | TGCAGGGTTTGGCTCTACTGGGGTGAATGGCAAGTGGGGCTCTAGAGTGATG<br>AAAGGAAGTTCTTTGTA | NA | NA |
| 15694757 | TGCAGTCCAGATGAAAGCTGGGCAGGCAATGGAAGAGCCTTATCCTCTAGG<br>CCAGGTG            | NA | NA |
| 15694779 | TGCAGTGACCAGCAGTGGCGTAGCTAGATGAGGGTGCAAAGCACTGTTTTGC<br>AGGAAACTTCACCGCAG | NA | NA |
| 15694858 | TGCAGATCTAAAAACACCTAACCTTAAAGACGGTCTTTCTAATTTAGCCACAT<br>CGG              | NA | NA |
| 15694872 | TGCAGCAATCTAGGAACTCTGTTAAGAACGATTGGCAGCGTG                                | NA | NA |
| 15694881 | TGCAGCAGCCATTGTAATTTGAATGTGCGCCGTCCGGATTACATAGCGCGCA<br>TG                | NA | NA |
| 15694946 | TGCAGGCCTCCCAGGATCTGGAGCAGGCATACTAGCAAGAGGAATTTCTGCC<br>GG                | NA | NA |
| 15698495 | TGCAGGTATATCTCATTAAAAATGCCAGCCATAATATTGATTGTATGCCTGT<br>CAGTCAAATGAGTAAG  | NA | NA |
| 15701619 | TGCAGGTGCACGAAGTCCTTTGGGGAGAGTCATTATTAGTATTGAATGACT<br>GGATTGACCTTCCACA   | NA | NA |
| 15704127 | TGCAGCGTGTCAACCCCTCTGGCGCGTCACCCTACCCGTGCCAGTGGAGA<br>GGACTGCTCCTCAACTG   | NA | NA |
| 15717728 | TGCAGGGCTTGGGCTGCAATCCTGTGTAAGAGAGCACTATGAACACAATCC<br>TAAG               | NA | NA |
